# Supplementary material for: REST/NRSF drives homeostatic plasticity of inhibitory synapses in a target-dependent fashion
Source: eLife journal article supplement (doi:10.7554/elife.69058), 2021-11-23
Supplement: fig9-figsupp1-data1 [file elife-69058-fig9-figsupp1-data1-v1.pdf]

Figure 9-figure supplement 1

Figure 9A-fig suppl 1 (left panel)

|              | NEG/veh       |               |               |               | NEG/4AP       |               |               |               | ODN/veh       |               |               |               | ODN/4AP       |               |               |               |
|--------------|---------------|---------------|---------------|---------------|---------------|---------------|---------------|---------------|---------------|---------------|---------------|---------------|---------------|---------------|---------------|---------------|
|              | 1hrs          | 6hrs          | 12hrs         | 24hrs         | 1hrs          | 6hrs          | 12hrs         | 24hrs         | 1hrs          | 6hrs          | 12hrs         | 24hrs         | 1hrs          | 6hrs          | 12hrs         | 24hrs         |
|              | 0.91222       | 0.82369       | 0.90872       | 0.94572       | 0.71937       | 0.99542       | 1.24067       | 0.91877       | 1.60419       | 1.25164       | 0.78551       | 0.70845       | 0.99308       | 1.05598       | 1.15945       | 1.39286       |
|              | 0.92122       | 0.99998       | 1.1627        | 0.96656       | 0.9408        | 1.02892       | 1.25607       | 1.60056       | 1.16341       | 1.08581       | 1.17122       | 1.09985       | 0.91255       | 1.13622       | 1.00659       | 0.9622        |
|              | 1.08561       | 1.17633       | 0.92858       | 0.84917       | 2.21616       | 0.68806       | 1.55762       | 0.99308       | 1.21669       | 0.87553       | 0.72622       | 0.84158       | 1.24935       | 1.03045       | 1.16659       | 0.77533       |
|              | 0.99317       | 0.74393       | 1.19886       | 1.34968       | 1.11233       | 0.77554       | 0.87208       | 0.99209       | 0.87623       | 0.75845       | 0.80364       | 1.16146       | 0.65175       | 0.83877       | 0.90288       | 0.71652       |
|              | 0.91122       | 0.7885        | 0.887         | 0.87242       | 1.02369       | 1.20555       | 1.18601       | 1.23911       | 0.92329       | 1.16746       | 1.07993       | 1.1268        | 1.10524       | 0.99561       | 0.73825       | 1.01191       |
|              | 0.78582       | 0.82775       | 0.80988       | 0.90281       | 0.92739       | 1.05767       | 0.75712       | 0.95754       | 1.14883       | 1.0029        | 0.79516       | 0.751         | 0.87049       | 0.73728       | 0.68708       | 1.38092       |
| <b>N</b>     | <b>6</b>      | <b>6</b>      | <b>6</b>      | <b>6</b>      | <b>6</b>      | <b>6</b>      | <b>6</b>      | <b>6</b>      | <b>6</b>      | <b>6</b>      | <b>6</b>      | <b>6</b>      | <b>6</b>      | <b>6</b>      | <b>6</b>      | <b>6</b>      |
| <b>Media</b> | <b>0.9349</b> | <b>0.8934</b> | <b>0.9826</b> | <b>0.9811</b> | <b>1.1566</b> | <b>0.9585</b> | <b>1.1449</b> | <b>1.1169</b> | <b>1.1554</b> | <b>1.0236</b> | <b>0.8936</b> | <b>0.9482</b> | <b>0.9637</b> | <b>0.9657</b> | <b>0.9435</b> | <b>1.0400</b> |
| <b>SD</b>    | <b>0.0996</b> | <b>0.1637</b> | <b>0.1591</b> | <b>0.1858</b> | <b>0.5353</b> | <b>0.1917</b> | <b>0.2893</b> | <b>0.2625</b> | <b>0.2596</b> | <b>0.1840</b> | <b>0.1840</b> | <b>0.2040</b> | <b>0.2055</b> | <b>0.1487</b> | <b>0.2049</b> | <b>0.2906</b> |
| <b>SE</b>    | <b>0.0407</b> | <b>0.0668</b> | <b>0.0649</b> | <b>0.0759</b> | <b>0.2185</b> | <b>0.0783</b> | <b>0.1181</b> | <b>0.1071</b> | <b>0.1060</b> | <b>0.0751</b> | <b>0.0751</b> | <b>0.0833</b> | <b>0.0839</b> | <b>0.0607</b> | <b>0.0836</b> | <b>0.1186</b> |

Figure 9A-fig suppl 1 (right panel)

|              | NEG/veh       |               |               |               | NEG/4AP       |               |               |               | ODN/veh       |               |               |               | ODN/4AP       |               |               |               |
|--------------|---------------|---------------|---------------|---------------|---------------|---------------|---------------|---------------|---------------|---------------|---------------|---------------|---------------|---------------|---------------|---------------|
|              | 1hrs          | 6hrs          | 12hrs         | 24hrs         | 1hrs          | 6hrs          | 12hrs         | 24hrs         | 1hrs          | 6hrs          | 12hrs         | 24hrs         | 1hrs          | 6hrs          | 12hrs         | 24hrs         |
|              | 0.92609       | 0.77964       | 0.88413       | 0.91778       | 1.23221       | 1.06763       | 1.45234       | 0.97981       | 0.85608       | 1.02005       | 1.06745       | 0.87664       | 1.07471       | 0.7536        | 1.39346       | 1.95776       |
|              | 0.96789       | 1.24743       | 0.83084       | 1.13453       | 0.86242       | 1.04745       | 1.01513       | 0.82646       | 0.98648       | 0.73782       | 0.88758       | 0.89949       | 1.26612       | 0.95359       | 1.10083       | 1.22161       |
|              | 0.91397       | 0.80662       | 1.15371       | 0.9477        | 1.18142       | 0.93776       | 1.26448       | 0.86742       | 1.435         | 0.85926       | 0.89277       | 0.9656        | 0.78744       | 1.08291       | 1.1418        | 0.81999       |
|              | 1.11814       | 1.35667       | 0.81668       | 0.65775       | 1.36168       | 0.69605       | 0.91816       | 1.03376       | 1.20555       | 0.94678       | 1.31518       | 0.91172       | 1.08375       | 1.02348       | 1.15737       | 0.85327       |
|              | 1.09337       | 0.83671       | 1.20348       | 1.3085        | 1.17548       | 1.21095       | 1.09005       | 1.21289       | 0.99489       | 1.14949       | 0.78221       | 1.27619       | 1.1318        | 0.75873       | 0.90109       | 1.23812       |
|              | 0.90885       | 0.85351       | 0.97984       | 0.97826       | 1.23178       | 1.21605       | 0.9736        | 0.75572       | 1.1737        | 0.99503       | 0.919         | 0.75686       | 1.36052       | 0.98566       | 0.94478       | 0.95636       |
| <b>N</b>     | <b>6</b>      | <b>6</b>      | <b>6</b>      | <b>6</b>      | <b>6</b>      | <b>6</b>      | <b>6</b>      | <b>6</b>      | <b>6</b>      | <b>6</b>      | <b>6</b>      | <b>6</b>      | <b>6</b>      | <b>6</b>      | <b>6</b>      | <b>6</b>      |
| <b>Media</b> | <b>0.9881</b> | <b>0.9801</b> | <b>0.9781</b> | <b>0.9908</b> | <b>1.1742</b> | <b>1.0293</b> | <b>1.1190</b> | <b>0.9460</b> | <b>1.1086</b> | <b>0.9514</b> | <b>0.9774</b> | <b>0.9478</b> | <b>1.1174</b> | <b>0.9263</b> | <b>1.1066</b> | <b>1.1745</b> |
| <b>SD</b>    | <b>0.0938</b> | <b>0.2530</b> | <b>0.1663</b> | <b>0.2190</b> | <b>0.1668</b> | <b>0.1945</b> | <b>0.2027</b> | <b>0.1654</b> | <b>0.2058</b> | <b>0.1414</b> | <b>0.1892</b> | <b>0.1751</b> | <b>0.1966</b> | <b>0.1387</b> | <b>0.1758</b> | <b>0.4234</b> |
| <b>SE</b>    | <b>0.0383</b> | <b>0.1033</b> | <b>0.0679</b> | <b>0.0894</b> | <b>0.0681</b> | <b>0.0794</b> | <b>0.0827</b> | <b>0.0675</b> | <b>0.0840</b> | <b>0.0577</b> | <b>0.0772</b> | <b>0.0715</b> | <b>0.0803</b> | <b>0.0566</b> | <b>0.0718</b> | <b>0.1728</b> |

Figure 9-figure supplement 1

| Figure 9A-fig suppl 1 (left panel) |             |         |          |
|------------------------------------|-------------|---------|----------|
| Tukey's multiple comparisor        | Significant | Summary | P Value  |
| 1hrs                               |             |         |          |
| NEG/veh vs. NEG/4AP                | No          | ns      | 0.393    |
| NEG/veh vs. ODN/veh                | No          | ns      | 0.398    |
| NEG/veh vs. ODN/4AP                | No          | ns      | 0.997    |
| NEG/4AP vs. ODN/veh                | No          | ns      | > 0.9999 |
| NEG/4AP vs. ODN/4AP                | No          | ns      | 0.517    |
| ODN/veh vs. ODN/4AP                | No          | ns      | 0.522    |
| 6hrs                               |             |         |          |
| NEG/veh vs. NEG/4AP                | No          | ns      | 0.966    |
| NEG/veh vs. ODN/veh                | No          | ns      | 0.788    |
| NEG/veh vs. ODN/4AP                | No          | ns      | 0.955    |
| NEG/4AP vs. ODN/veh                | No          | ns      | 0.966    |
| NEG/4AP vs. ODN/4AP                | No          | ns      | > 0.9999 |
| ODN/veh vs. ODN/4AP                | No          | ns      | 0.976    |
| 12hrs                              |             |         |          |
| NEG/veh vs. NEG/4AP                | No          | ns      | 0.654    |
| NEG/veh vs. ODN/veh                | No          | ns      | 0.920    |
| NEG/veh vs. ODN/4AP                | No          | ns      | 0.992    |
| NEG/4AP vs. ODN/veh                | No          | ns      | 0.283    |
| NEG/4AP vs. ODN/4AP                | No          | ns      | 0.479    |
| ODN/veh vs. ODN/4AP                | No          | ns      | 0.984    |
| 24hrs                              |             |         |          |
| NEG/veh vs. NEG/4AP                | No          | ns      | 0.767    |
| NEG/veh vs. ODN/veh                | No          | ns      | 0.995    |
| NEG/veh vs. ODN/4AP                | No          | ns      | 0.975    |
| NEG/4AP vs. ODN/veh                | No          | ns      | 0.625    |
| NEG/4AP vs. ODN/4AP                | No          | ns      | 0.946    |
| ODN/veh vs. ODN/4AP                | No          | ns      | 0.913    |

| Figure 9A-fig suppl 1 (right panel) |    |             |          |         |
|-------------------------------------|----|-------------|----------|---------|
| Tukey's multiple comparisons        | t  | Significant | Summary  | P Value |
| 1hrs                                |    |             |          |         |
| NEG/veh vs. NEG/4AP                 | No | ns          |          | 0.405   |
| NEG/veh vs. ODN/veh                 | No | ns          |          | 0.742   |
| NEG/veh vs. ODN/4AP                 | No | ns          |          | 0.698   |
| NEG/4AP vs. ODN/veh                 | No | ns          |          | 0.946   |
| NEG/4AP vs. ODN/4AP                 | No | ns          |          | 0.964   |
| ODN/veh vs. ODN/4AP                 | No | ns          |          | 1.000   |
| 6hrs                                |    |             |          |         |
| NEG/veh vs. NEG/4AP                 | No | ns          |          | 0.976   |
| NEG/veh vs. ODN/veh                 | No | ns          |          | 0.995   |
| NEG/veh vs. ODN/4AP                 | No | ns          |          | 0.969   |
| NEG/4AP vs. ODN/veh                 | No | ns          |          | 0.914   |
| NEG/4AP vs. ODN/4AP                 | No | ns          |          | 0.823   |
| ODN/veh vs. ODN/4AP                 | No | ns          |          | 0.997   |
| 12hrs                               |    |             |          |         |
| NEG/veh vs. NEG/4AP                 | No | ns          |          | 0.639   |
| NEG/veh vs. ODN/veh                 | No | ns          | > 0.9999 |         |
| NEG/veh vs. ODN/4AP                 | No | ns          |          | 0.703   |
| NEG/4AP vs. ODN/veh                 | No | ns          |          | 0.635   |
| NEG/4AP vs. ODN/4AP                 | No | ns          |          | 1.000   |
| ODN/veh vs. ODN/4AP                 | No | ns          |          | 0.699   |
| 24hrs                               |    |             |          |         |
| NEG/veh vs. NEG/4AP                 | No | ns          |          | 0.982   |
| NEG/veh vs. ODN/veh                 | No | ns          |          | 0.984   |
| NEG/veh vs. ODN/4AP                 | No | ns          |          | 0.416   |
| NEG/4AP vs. ODN/veh                 | No | ns          | > 0.9999 |         |
| NEG/4AP vs. ODN/4AP                 | No | ns          |          | 0.228   |
| ODN/veh vs. ODN/4AP                 | No | ns          |          | 0.234   |

**Figure 9-figure supplement 1**

**Figure 9C-fig suppl 1 (left panel)**

| NEG/veh | NEG/4AP | ODN/veh | ODN/4AP |
|---------|---------|---------|---------|
| 86.001  | 76.379  | 106.711 | 112.879 |
| 118.556 | 127.860 | 99.019  | 111.791 |
| 107.262 | 111.554 | 96.296  | 101.401 |
| 88.181  | 107.929 | 106.988 | 102.406 |
| 125.326 | 87.512  | 123.142 | 69.395  |
| 74.674  | 76.480  | 65.438  | 66.391  |

**Figure 9C-fig suppl 1 (right panel)**

| NEG/veh  | NEG/4AP  | ODN/veh  | ODN/4AP  |
|----------|----------|----------|----------|
| 82.76468 | 104.6871 | 95.95869 | 108.8301 |
| 130.162  | 130.1843 | 111.8836 | 102.7617 |
| 98.40442 | 102.4528 | 117.642  | 93.24356 |
| 88.66893 | 121.4297 | 114.3083 | 96.79023 |
| 138.609  | 96.08977 | 65.41962 | 37.47482 |
| 61.39098 | 82.66101 | 115.3505 | 84.4653  |
| 100      | 119.7174 | 149.4082 | 143.4943 |
| 116.9293 | 67.88343 | 82.24727 | 53.48214 |
| 83.07072 | 67.00447 | 68.6636  | 52.5048  |

|              |                 |                |                |                |                 |                |                 |                |
|--------------|-----------------|----------------|----------------|----------------|-----------------|----------------|-----------------|----------------|
| <b>N</b>     | <b>6</b>        | <b>6</b>       | <b>6</b>       | <b>6</b>       | <b>9</b>        | <b>9</b>       | <b>9</b>        | <b>9</b>       |
| <b>Media</b> | <b>100.0000</b> | <b>97.9522</b> | <b>99.5989</b> | <b>94.0439</b> | <b>100.0000</b> | <b>99.1233</b> | <b>102.3202</b> | <b>85.8941</b> |
| <b>SD</b>    | <b>20.0775</b>  | <b>21.0451</b> | <b>19.1711</b> | <b>20.8137</b> | <b>24.7292</b>  | <b>22.9572</b> | <b>26.9138</b>  | <b>33.1906</b> |
| <b>SE</b>    | <b>8.1966</b>   | <b>8.5916</b>  | <b>7.8266</b>  | <b>8.4971</b>  | <b>8.2431</b>   | <b>7.6524</b>  | <b>8.9713</b>   | <b>11.0635</b> |

**Figure 9-figure supplement 1**

| <i>Figure 9C-fig suppl 1 (left panel)</i> |            |         |          |
|-------------------------------------------|------------|---------|----------|
| <b>Tukey's multiple comparisons test</b>  | Significan | Summary | P Value  |
| NEG :veh vs. NEG :4AP                     | No         | ns      | 0.998    |
| NEG :veh vs. ODN :veh                     | No         | ns      | > 0.9999 |
| NEG :veh vs. ODN :4AP                     | No         | ns      | 0.9561   |
| NEG :4AP vs. ODN :veh                     | No         | ns      | 0.999    |
| NEG :4AP vs. ODN :4AP                     | No         | ns      | 0.9868   |
| ODN :veh vs. ODN :4AP                     | No         | ns      | 0.9639   |

  

| <i>Figure 9C-fig suppl 1 (right panel)</i> |            |         |         |
|--------------------------------------------|------------|---------|---------|
| <b>Tukey's multiple comparisons test</b>   | Significan | Summary | P Value |
| NEG :veh vs. NEG :4AP                      | No         | ns      | 0.9999  |
| NEG :veh vs. ODN :veh                      | No         | ns      | 0.9979  |
| NEG :veh vs. ODN :4AP                      | No         | ns      | 0.6926  |
| NEG :4AP vs. ODN :veh                      | No         | ns      | 0.9945  |
| NEG :4AP vs. ODN :4AP                      | No         | ns      | 0.7328  |
| ODN :veh vs. ODN :4AP                      | No         | ns      | 0.582   |

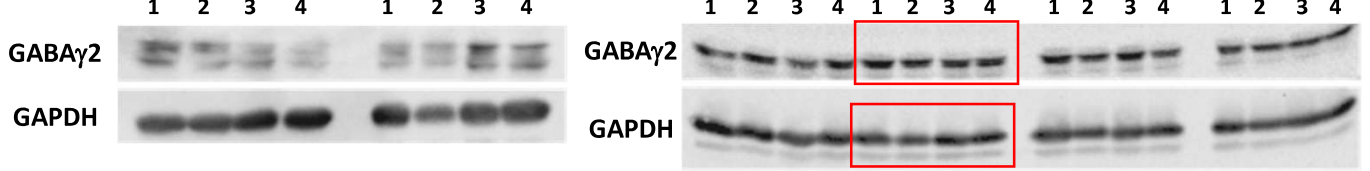

**N7+N8+N9**

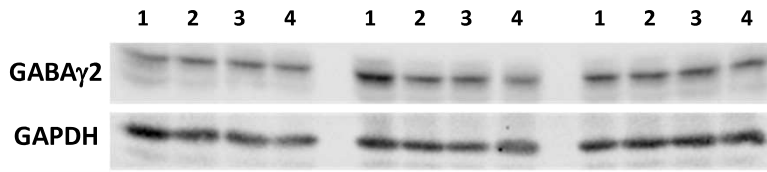

antiGABA receptor  $\gamma$ 2 subunit SySy 1:1000

antiGAPDH Santacruz 1:1000

Red square indicates the representative blot of the figure;

Layout legend: 1 is for NEG veh  
 2 is for NEG 4AP  
 3 is for ODN veh  
 4 is for ODN 4AP

**Figure 9 – figure supplement 1 - panel B-GABA receptor  $\alpha$ 2 subunit dataset**

**N1+N2+N3+N4**

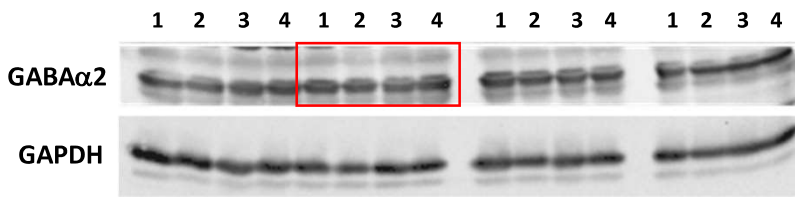

**N5+N6**

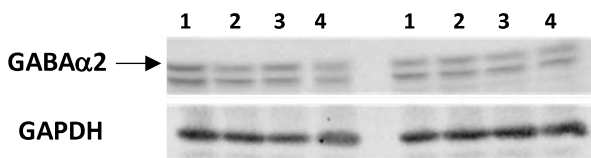

antiGABA receptor  $\alpha$ 2 subunit SySy 1:1000

Red square indicates the representative blot of the figure;

Layout legend: 1 is for NEG veh  
 2 is for NEG 4AP  
 3 is for ODN veh  
 4 is for ODN 4AP

For GABA receptor  $\alpha$ 2 subunit GAPDH are the same as  $\gamma$ 2 subunit because it has been analyzed on the same lysates.
